# Supplementary material for: Single-cell mobility shift electrophoresis reports protein localization to the cell membrane
Source: Royal Society of Chemistry journal article supplement (doi:10.1039/c8an01441h), 2018-09-11

## Supplementary Figures

**Figure S1:** The migration distance of GAPDH for MCF7 cells stained with unstained MCF7 cells (“No Stain”), anti-EpCAM-1 stained MCF7 cells (“Stained”), and MCF7 cells stained with an isotype-matched antibody (“Isotype”) shows no significant difference between the three groups tested (Kruskal-Wallis test, Kruskal-Wallis statistic = 3.251, p value = 0.1968, 3 groups with total N = 37).

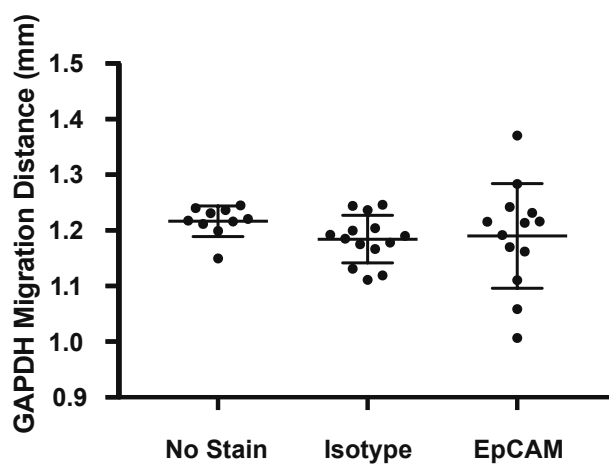

Supplement: c8an01441h1.pdf [file c8an01441h1.pdf]
